# Supplementary figures and images for: Active hydrogen tuning by copper–cobalt bimetal catalysts for boosting ammonia electrosynthesis from simulated wastewater
Source: Royal Society of Chemistry journal article supplement (doi:10.1039/d4gc04120h), 2024-11-07

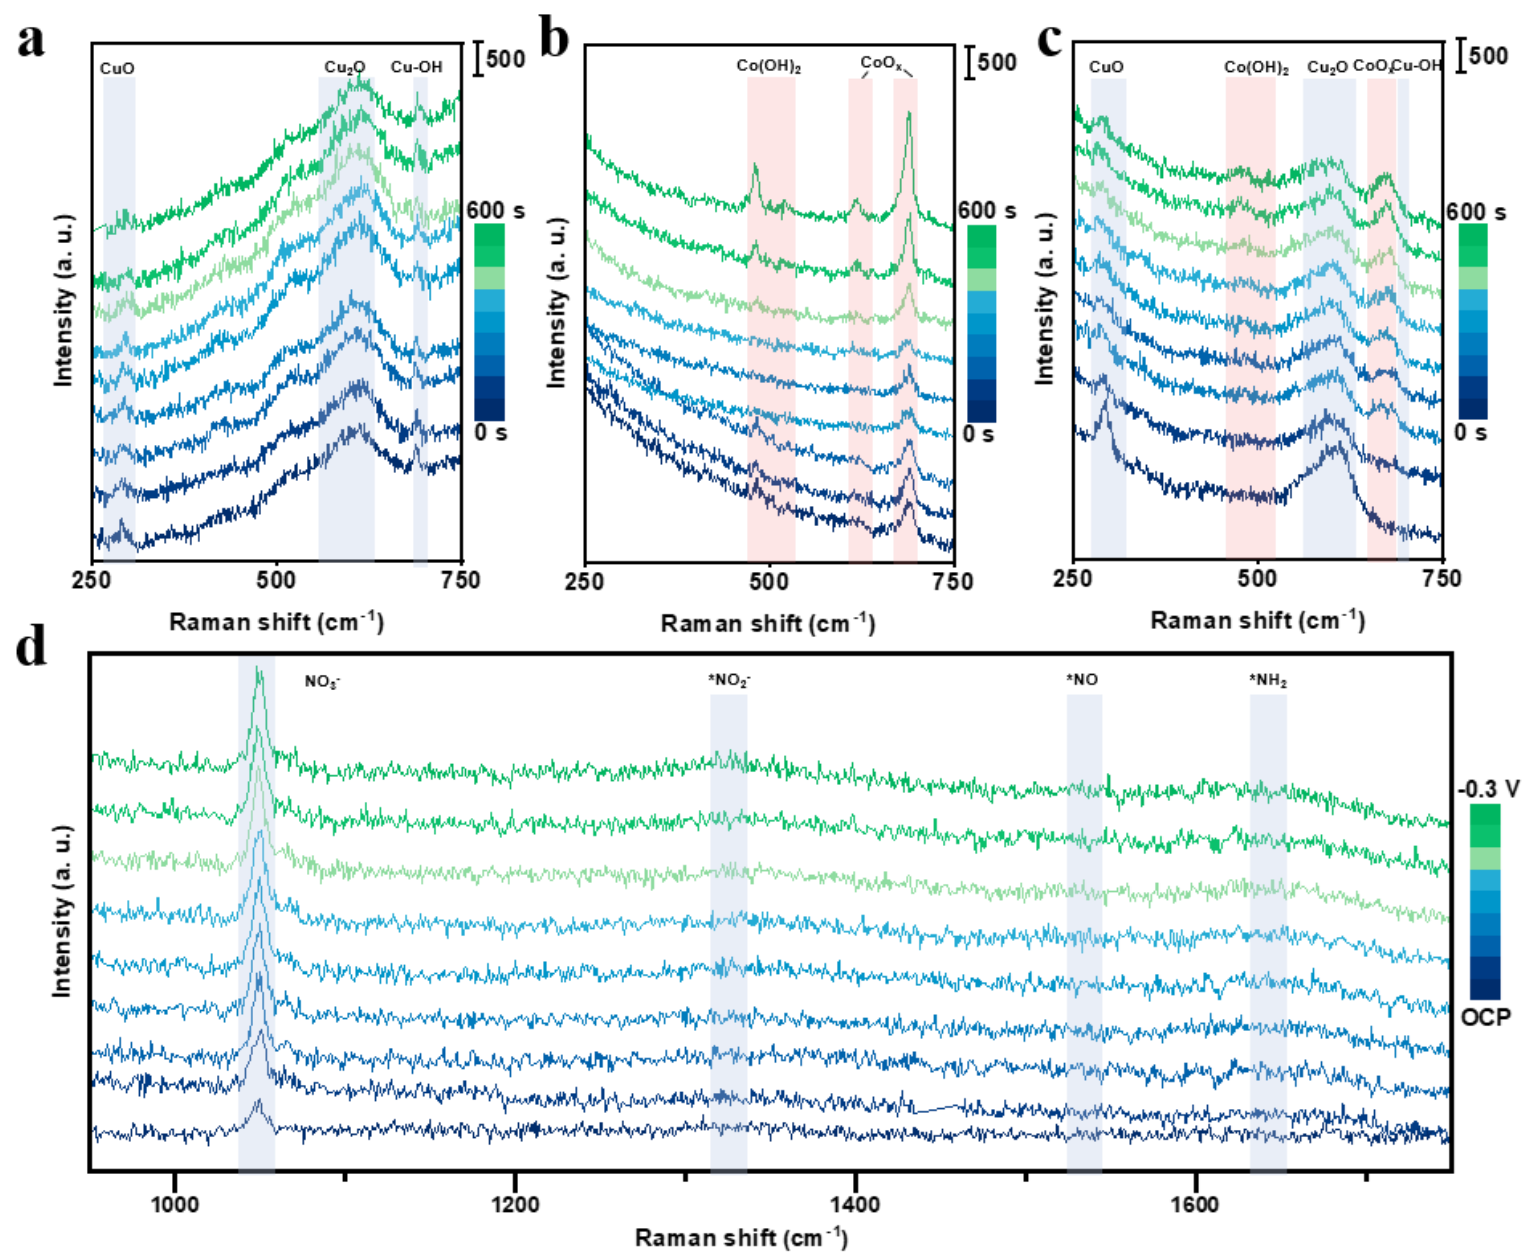

Supplement: d4gc04120h10.pdf [file d4gc04120h10.pdf]

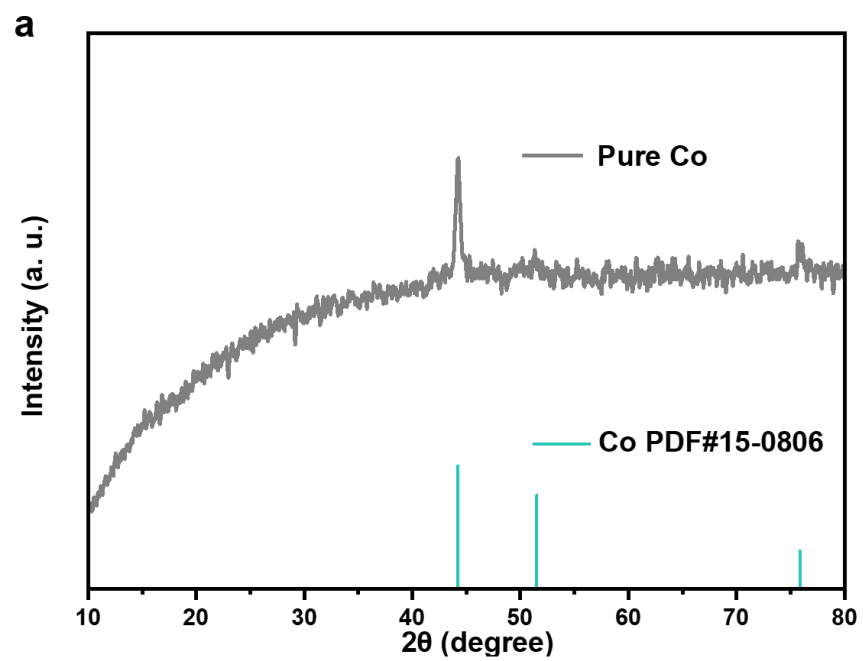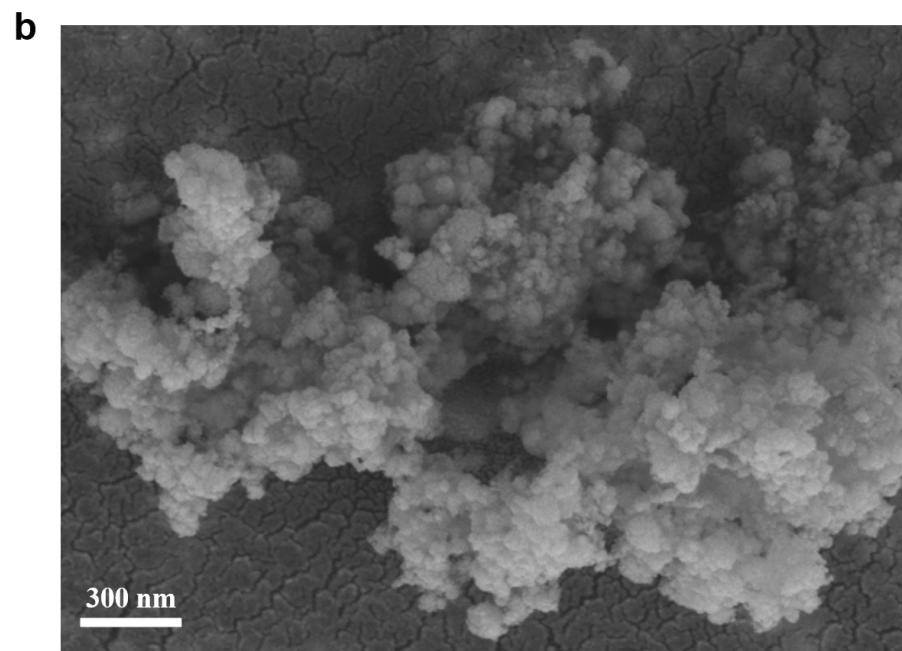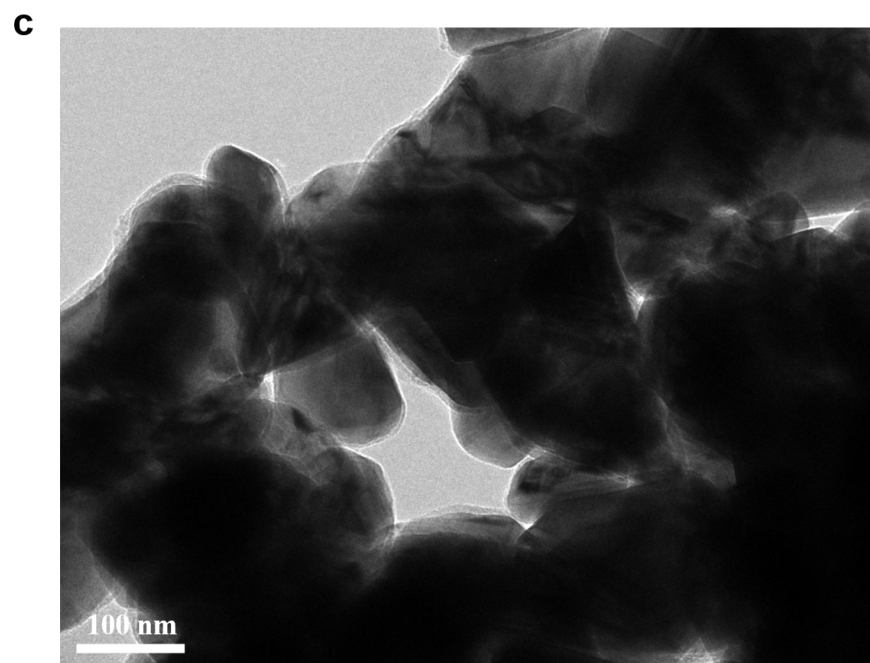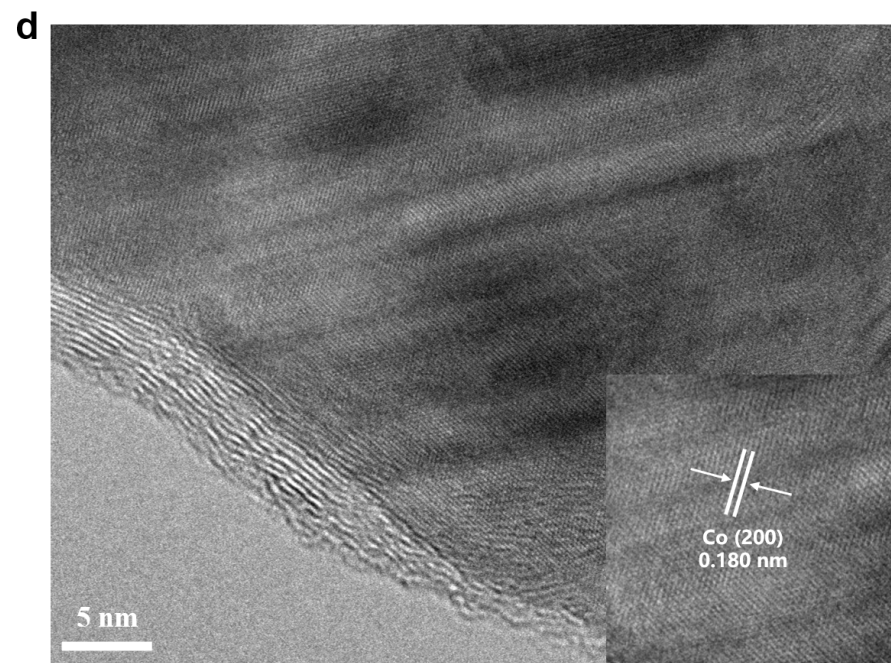

Supplement: d4gc04120h11.pdf [file d4gc04120h11.pdf]

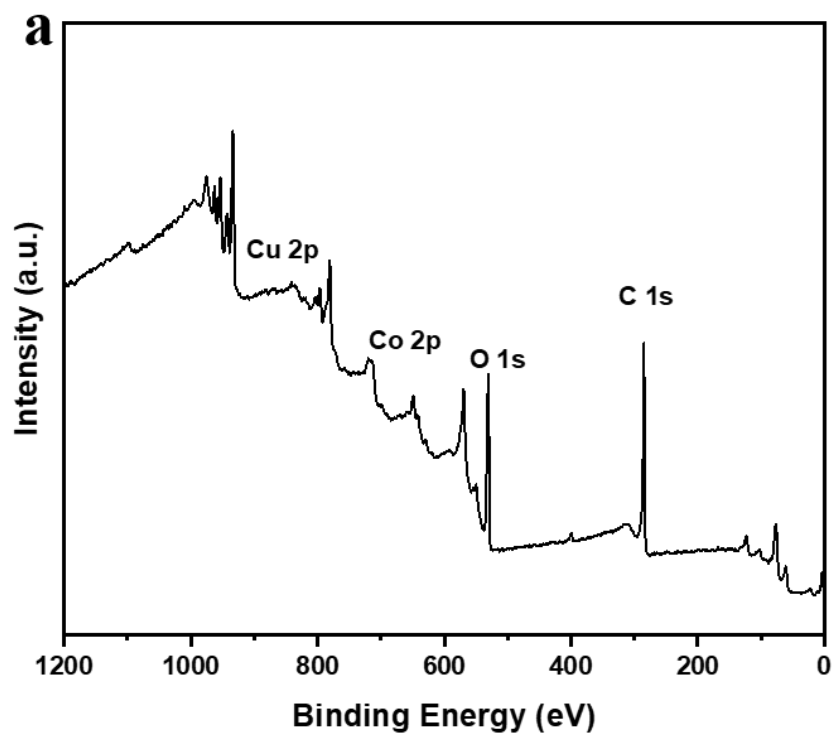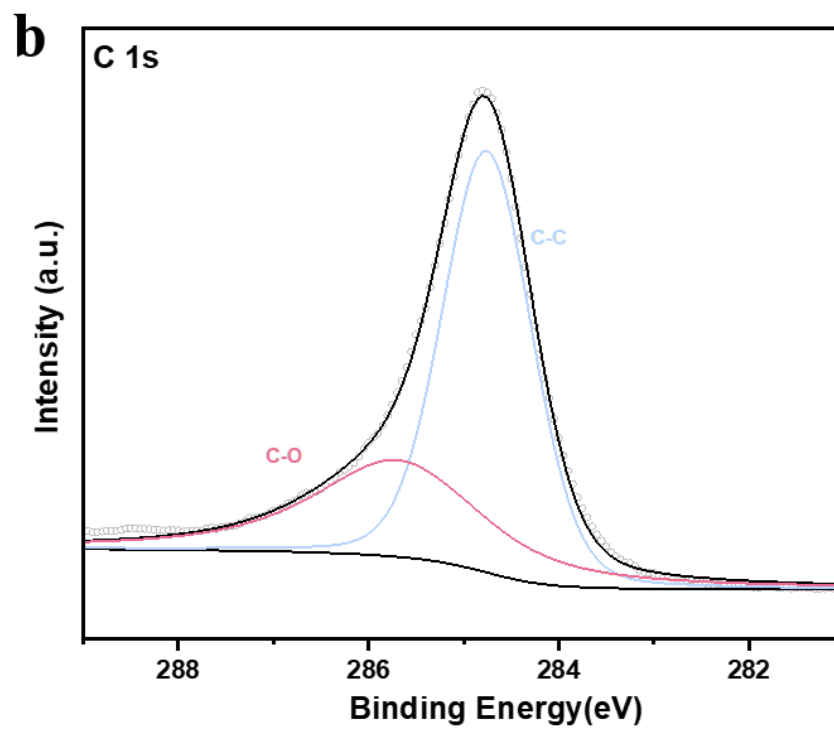

Supplement: d4gc04120h12.pdf [file d4gc04120h12.pdf]

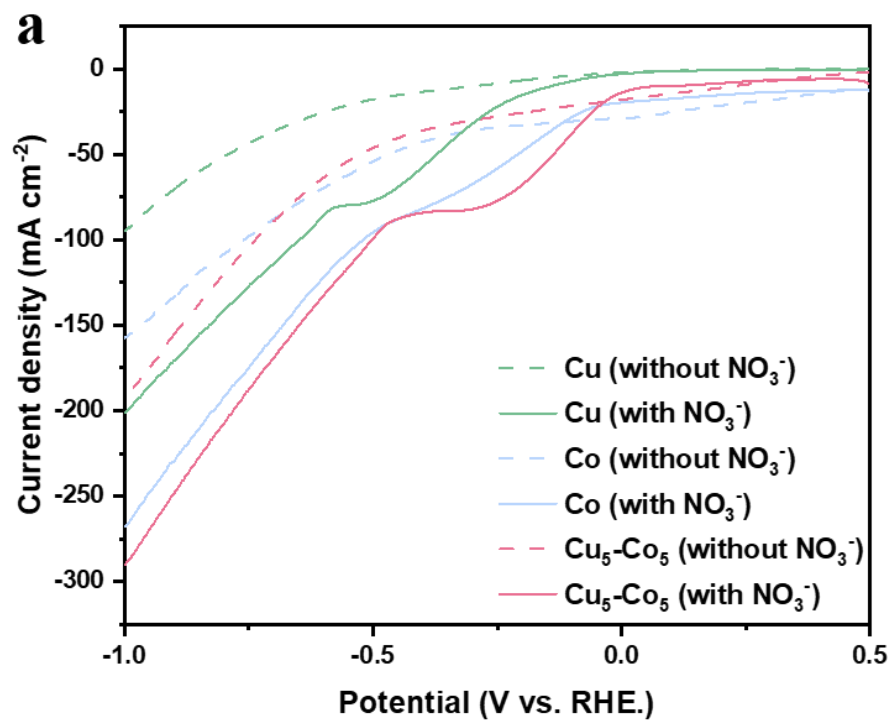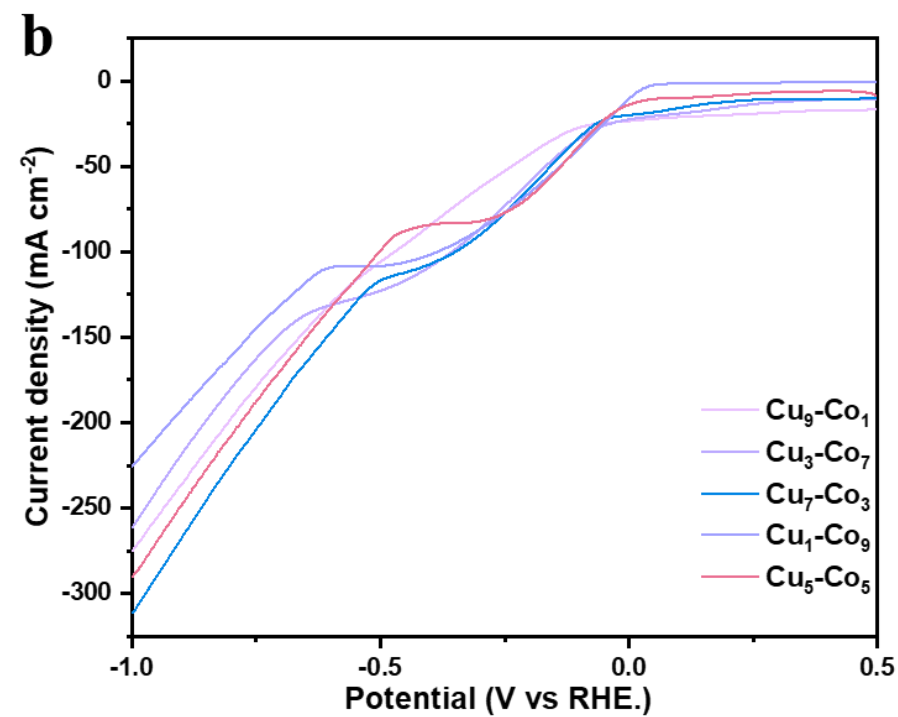

Supplement: d4gc04120h13.pdf [file d4gc04120h13.pdf]

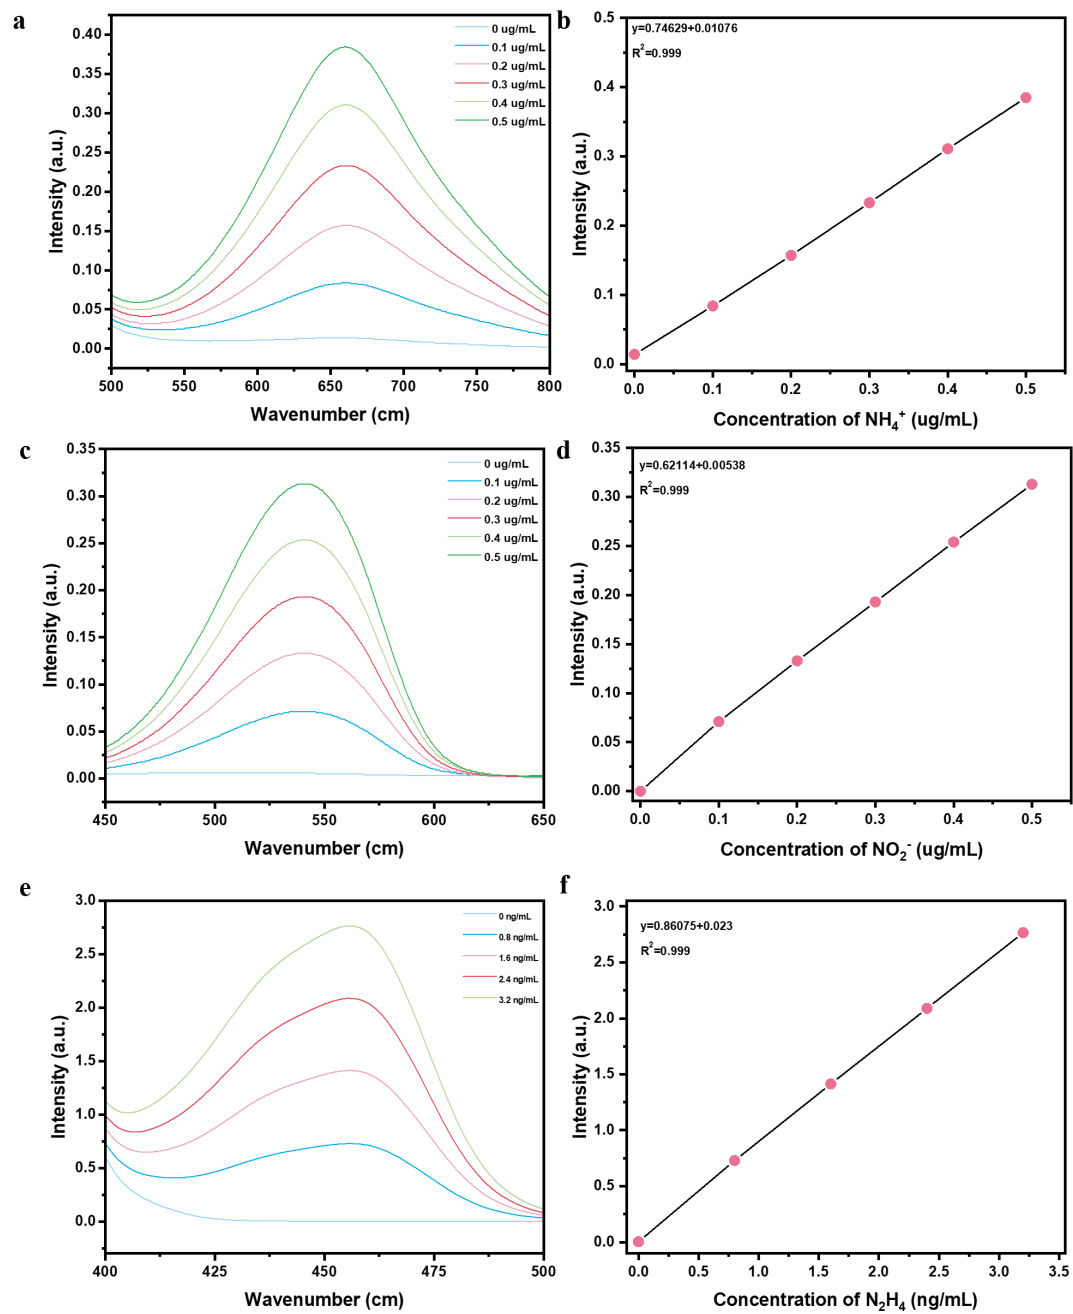

Supplement: d4gc04120h14.pdf [file d4gc04120h14.pdf]

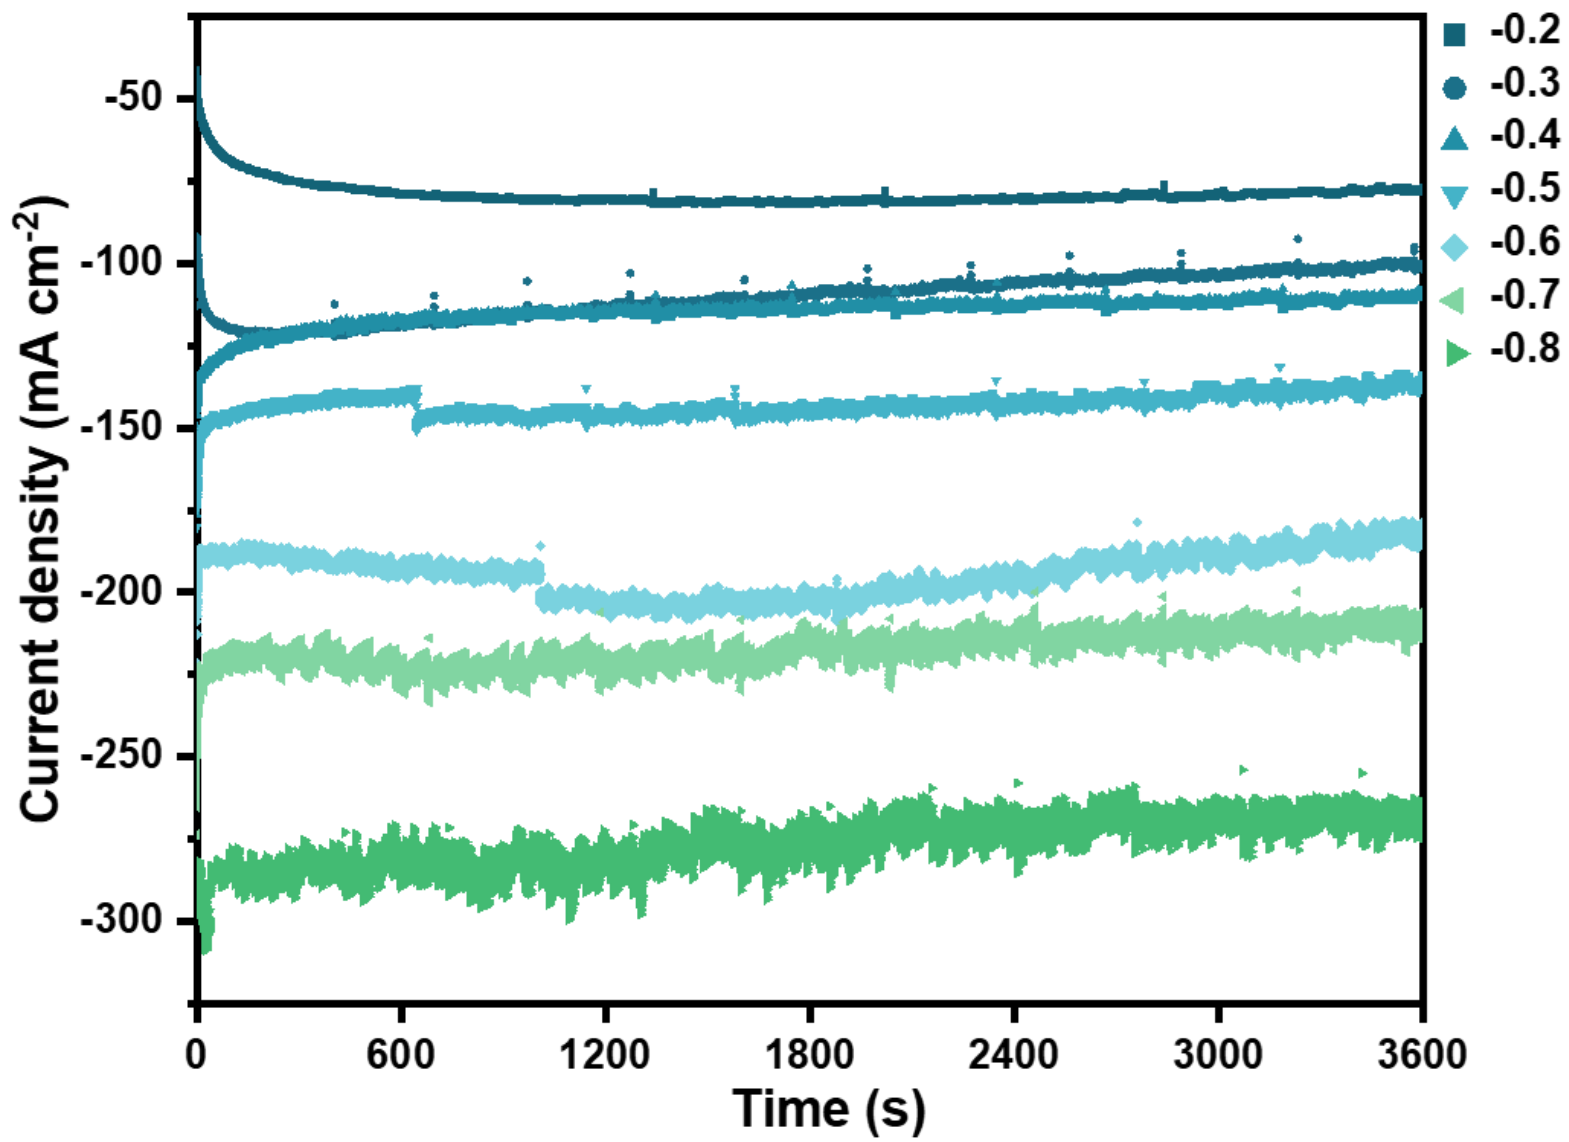

Supplement: d4gc04120h15.pdf [file d4gc04120h15.pdf]

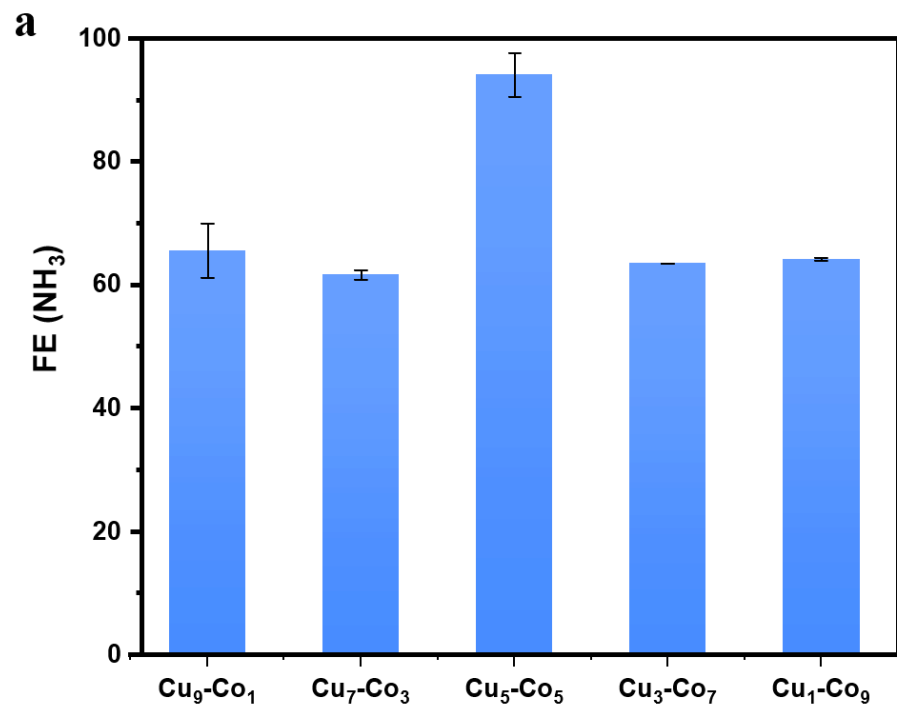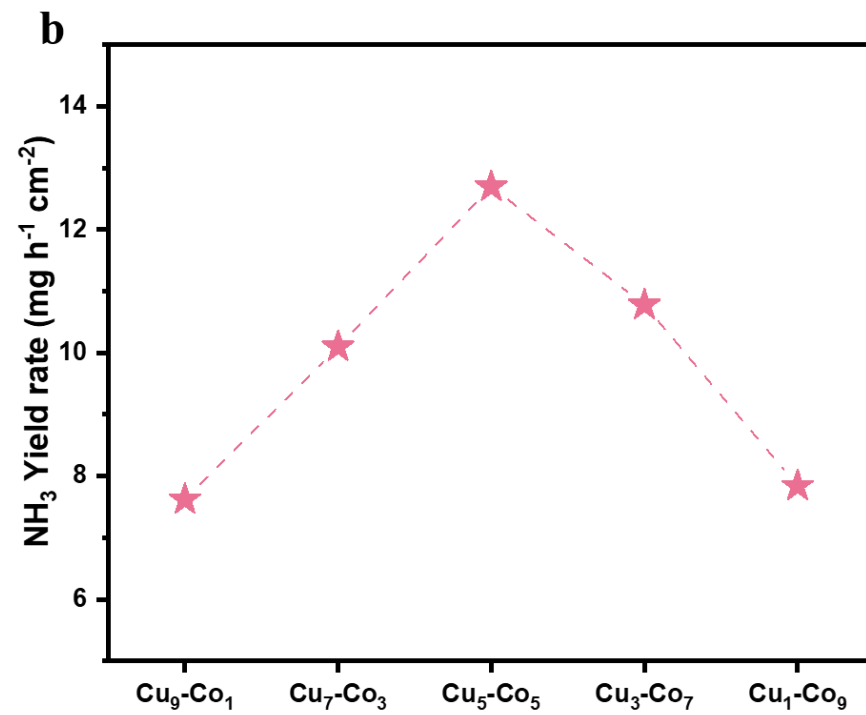

Supplement: d4gc04120h16.pdf [file d4gc04120h16.pdf]

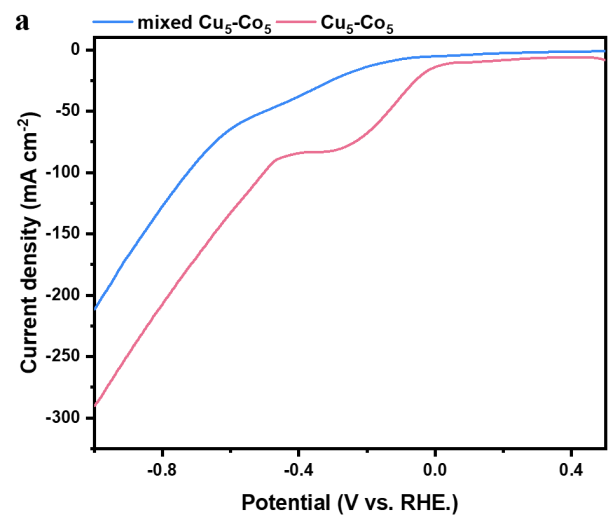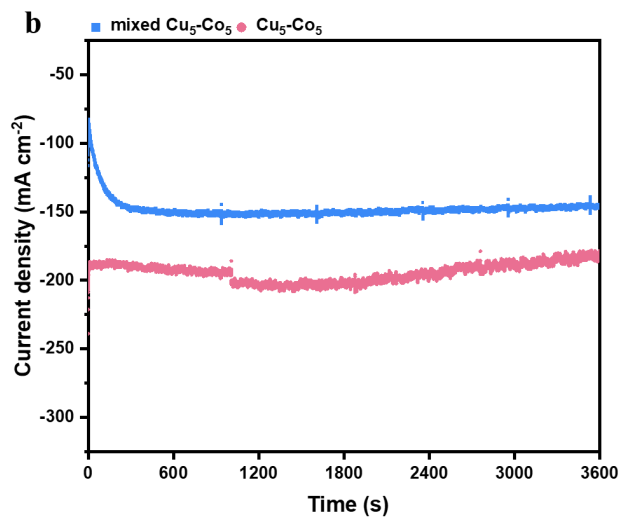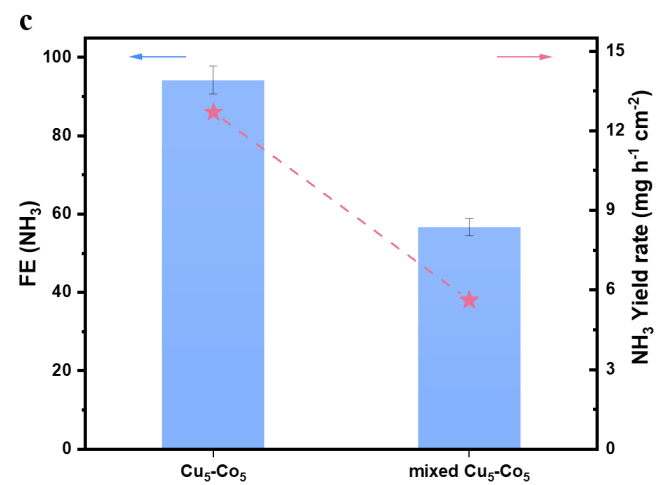

Supplement: d4gc04120h17.pdf [file d4gc04120h17.pdf]

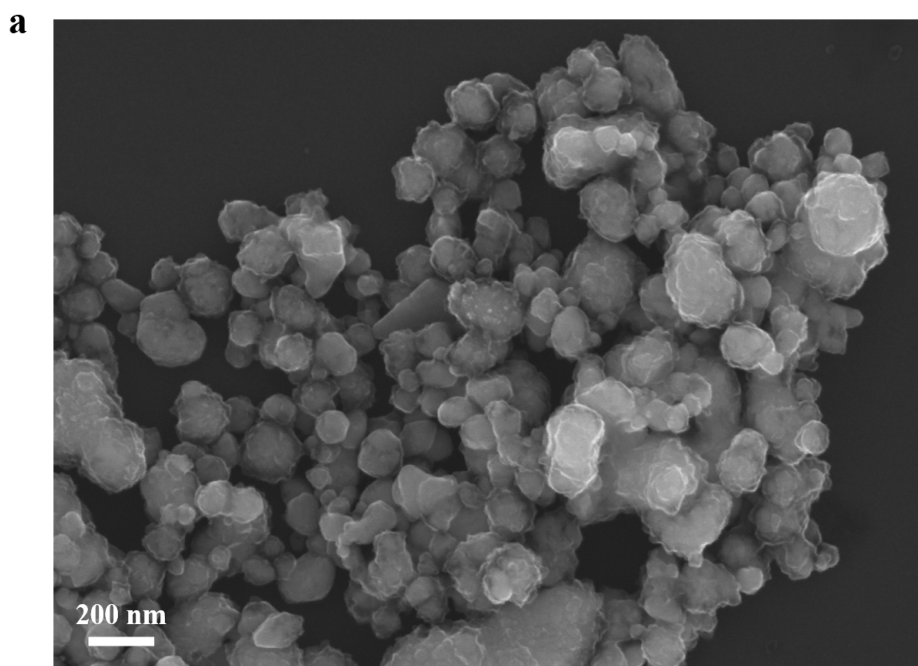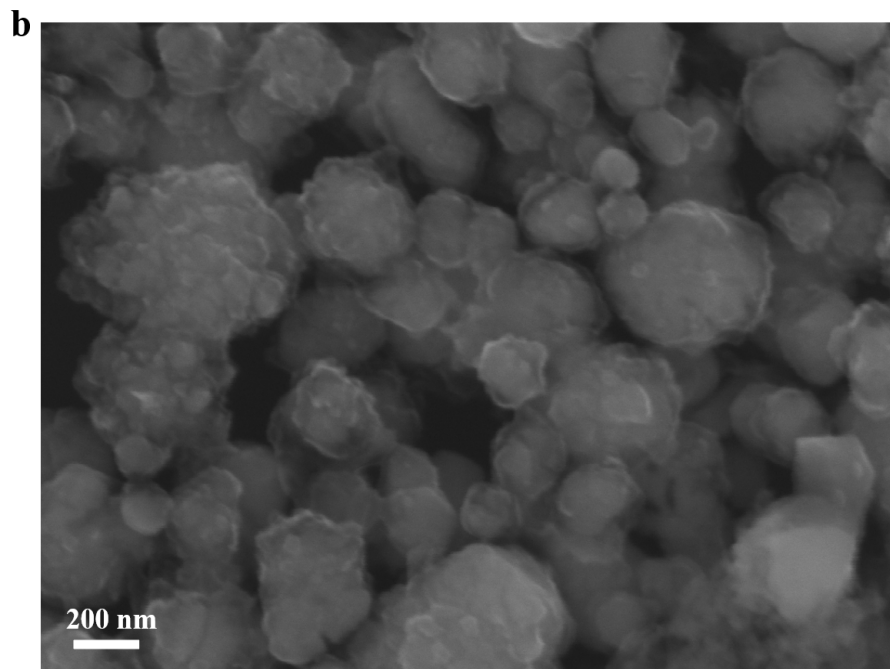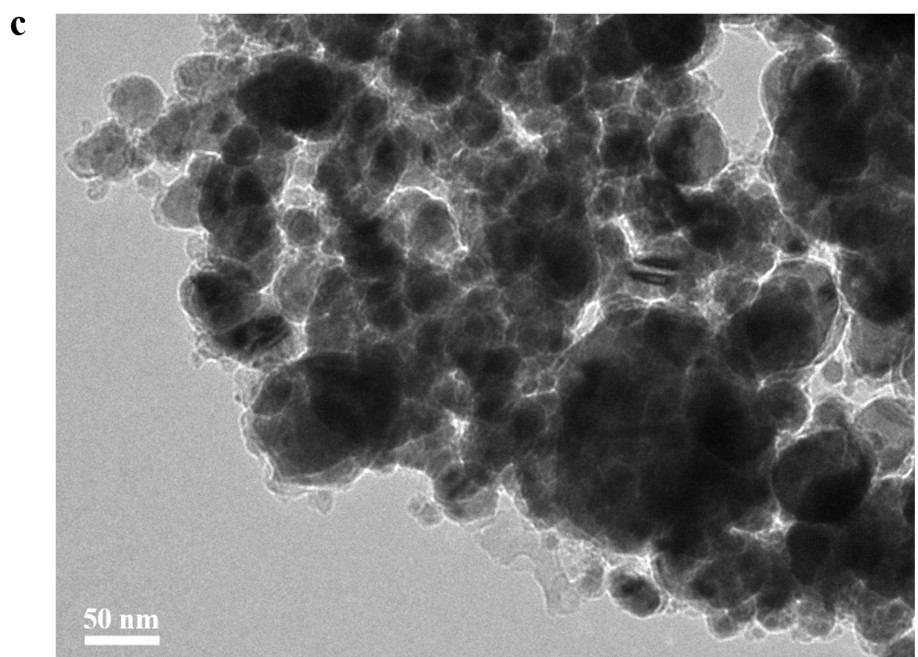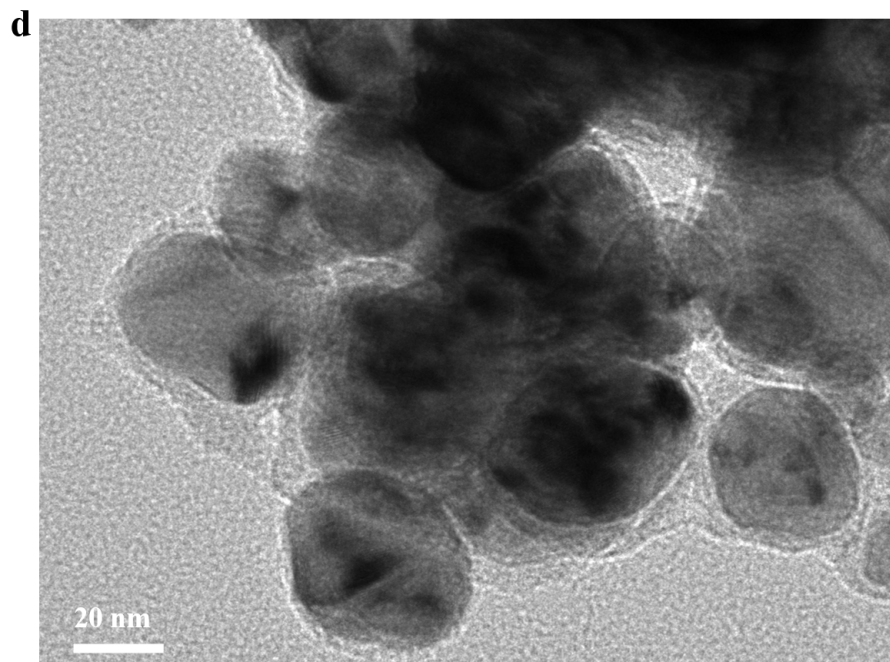

Supplement: d4gc04120h18.pdf [file d4gc04120h18.pdf]

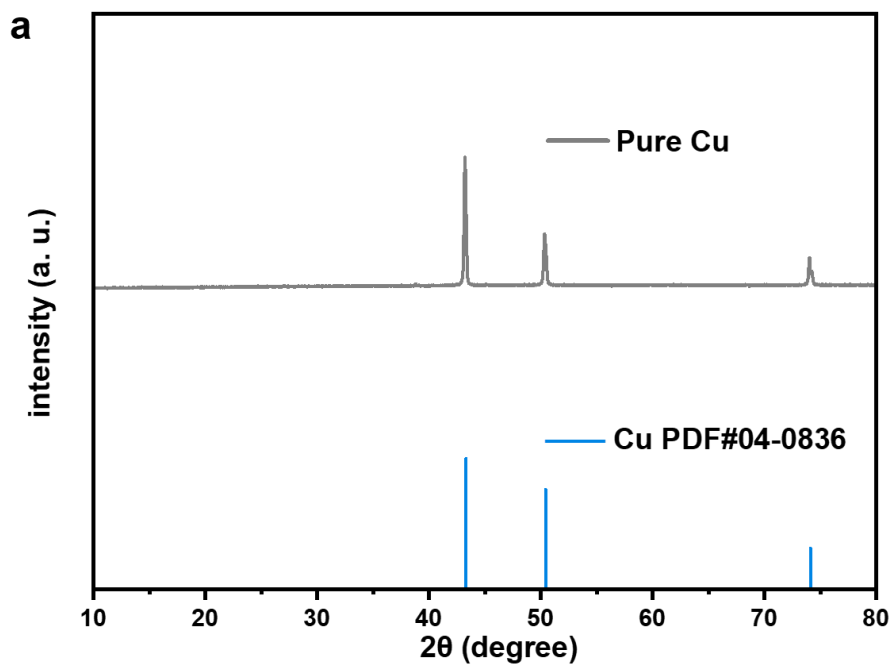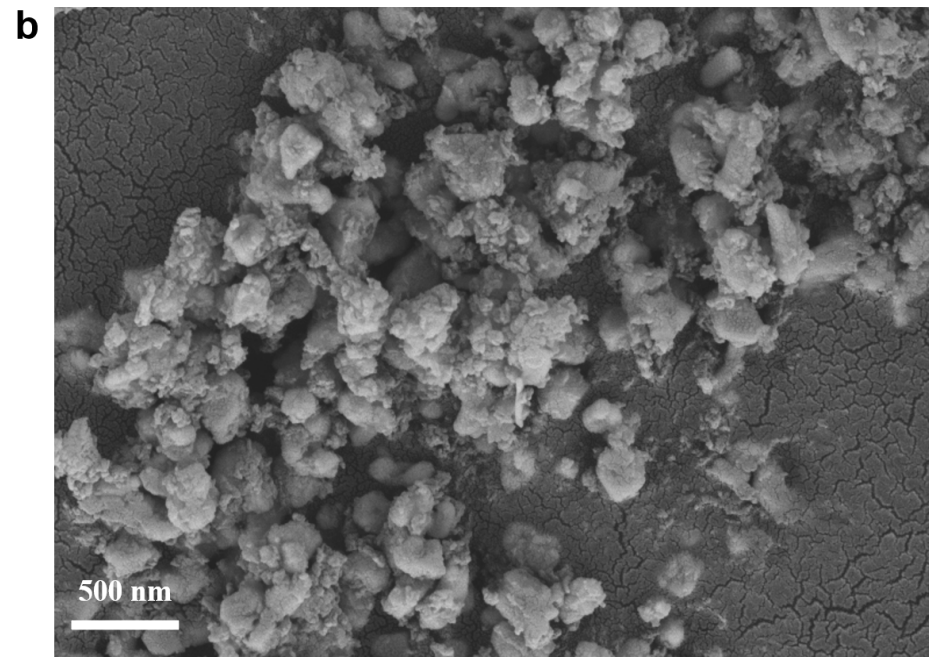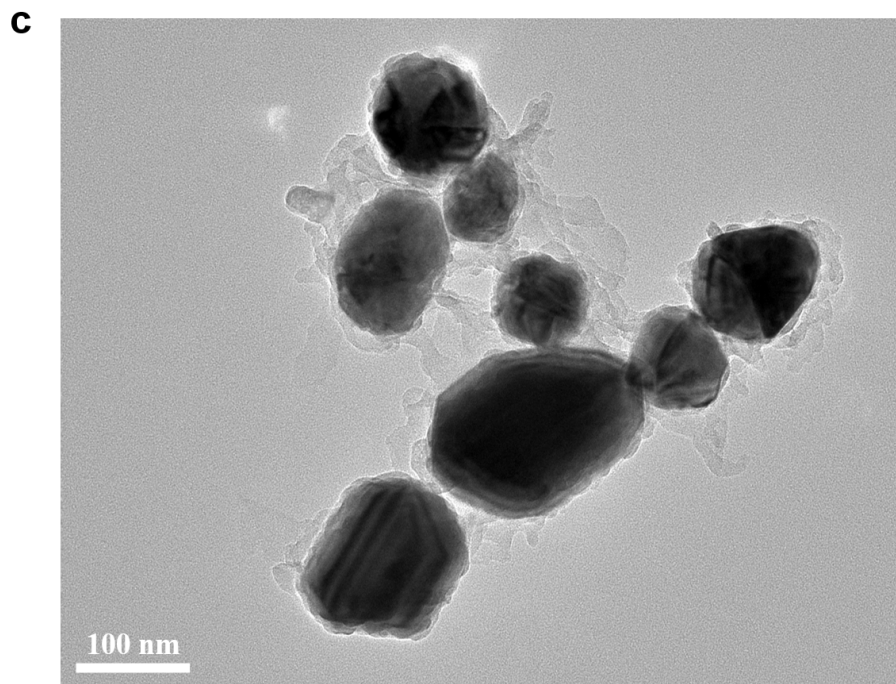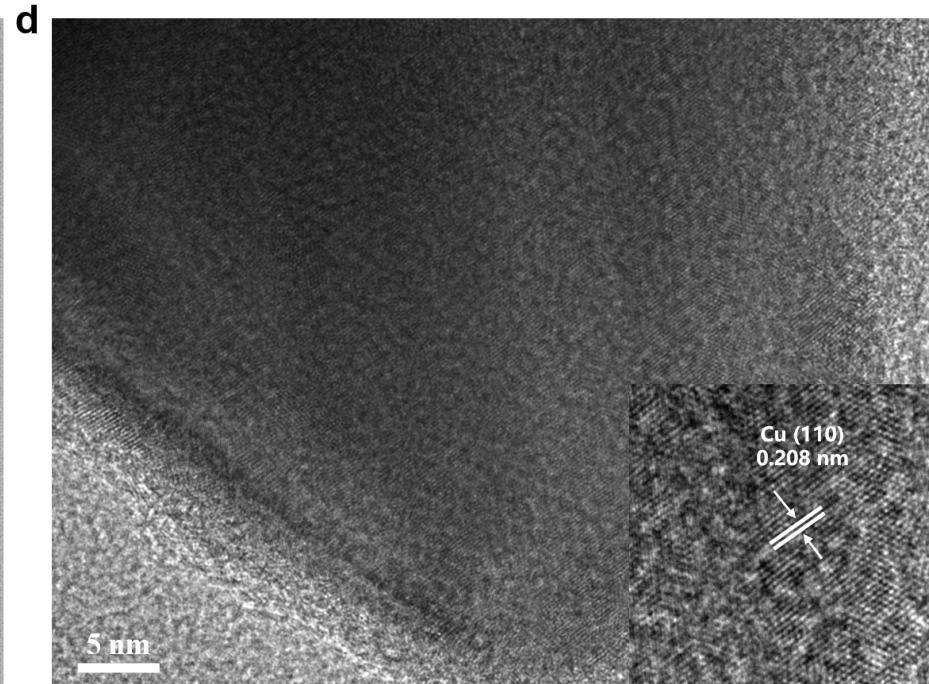

Supplement: d4gc04120h2.pdf [file d4gc04120h2.pdf]

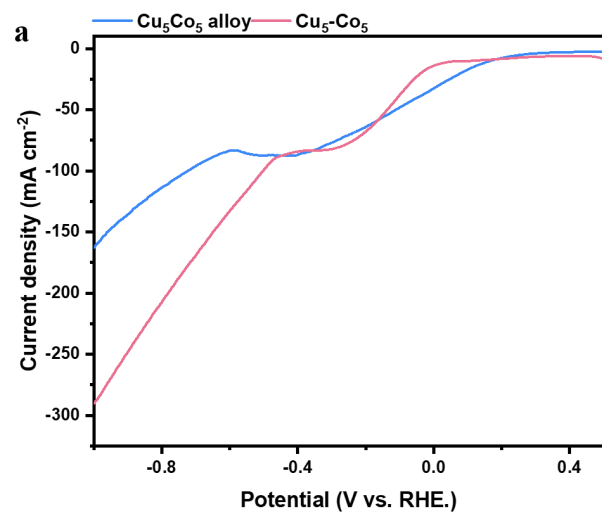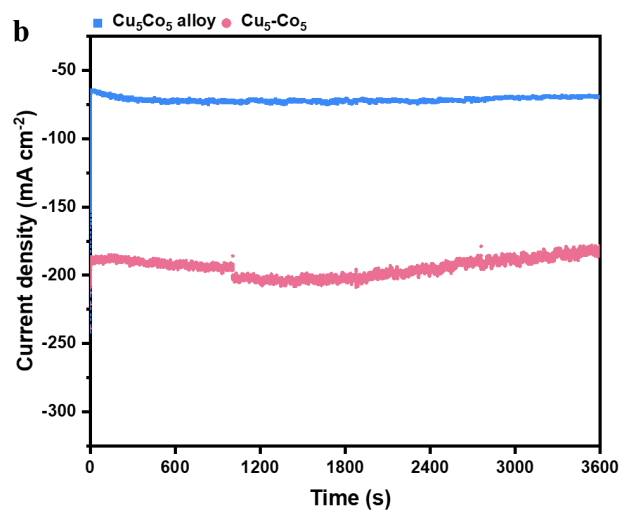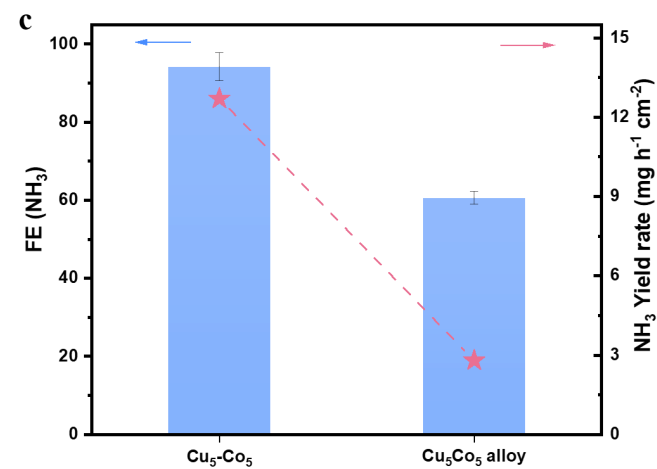

Supplement: d4gc04120h3.pdf [file d4gc04120h3.pdf]

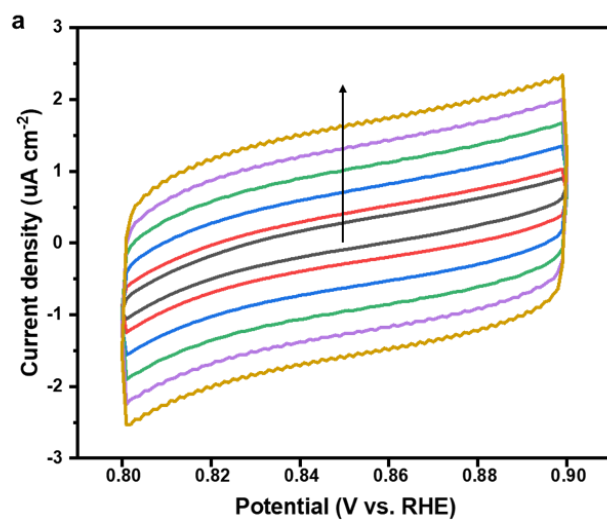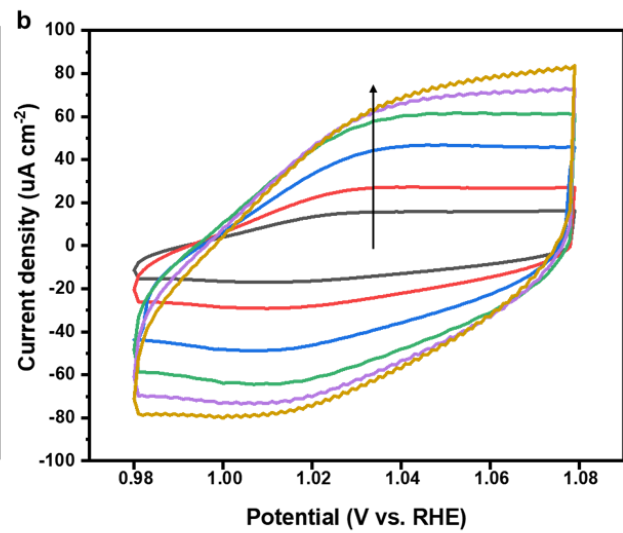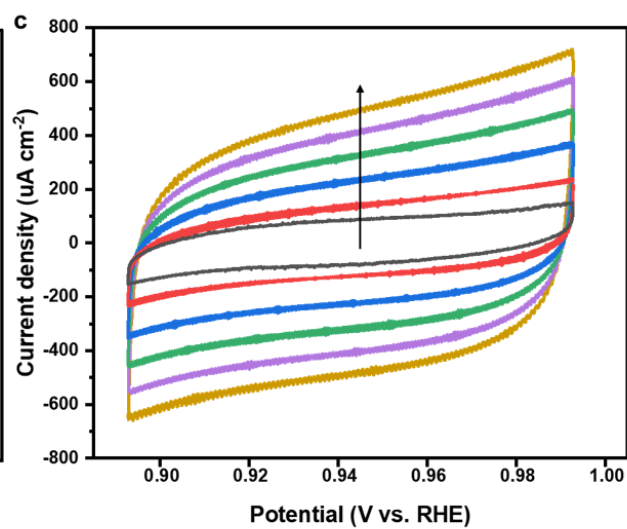

Supplement: d4gc04120h4.pdf [file d4gc04120h4.pdf]

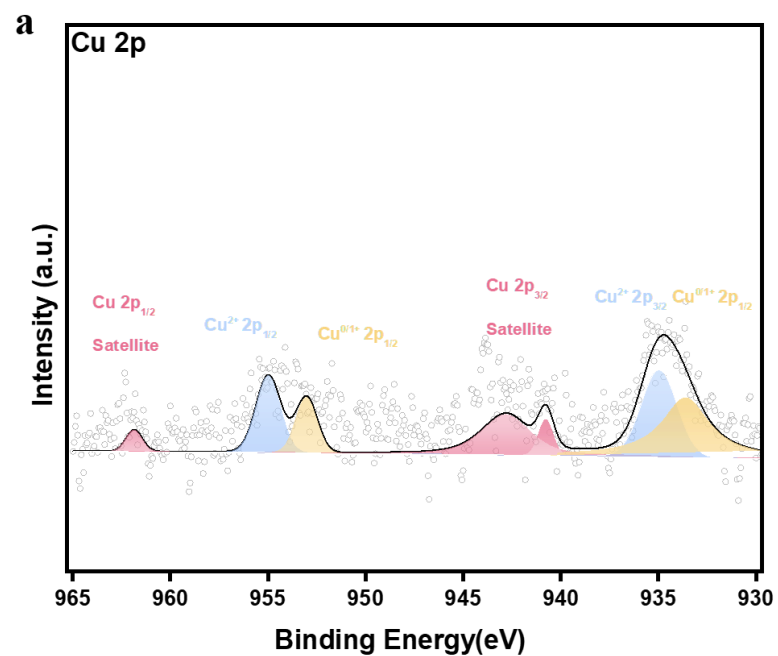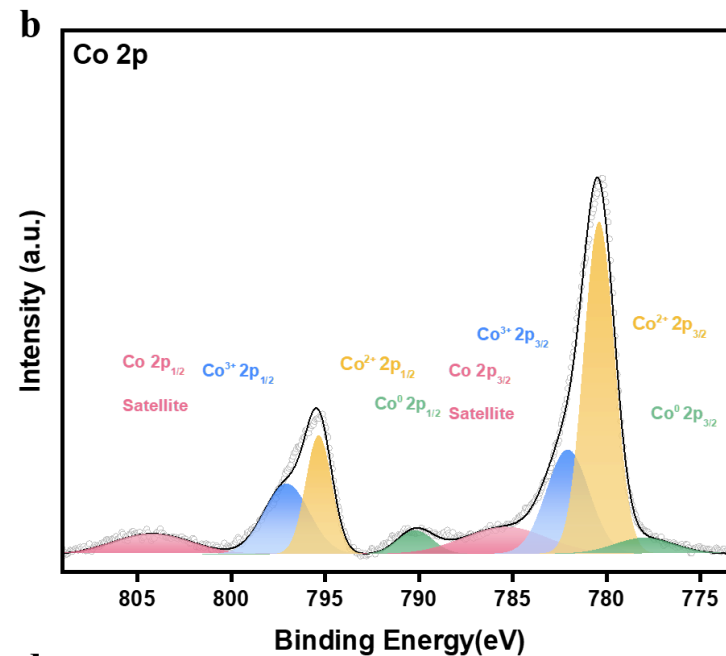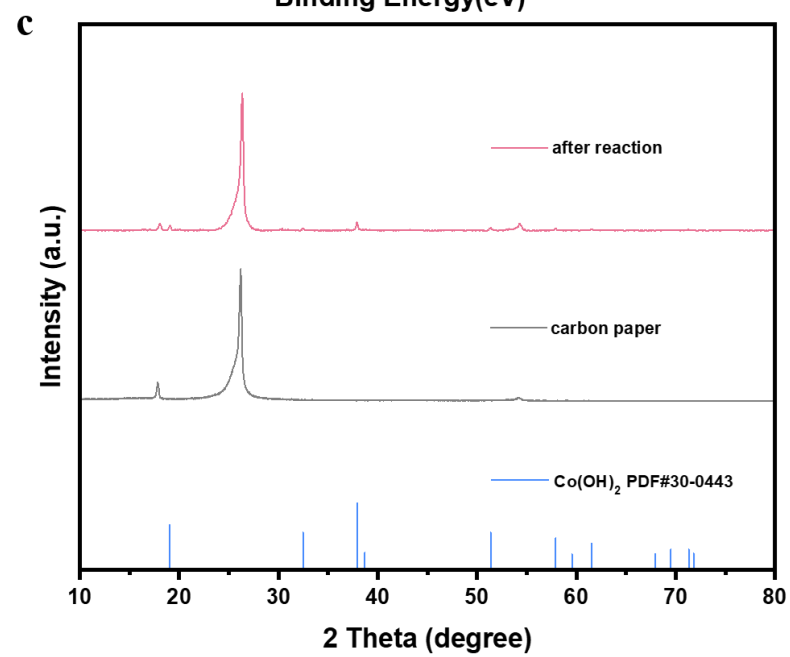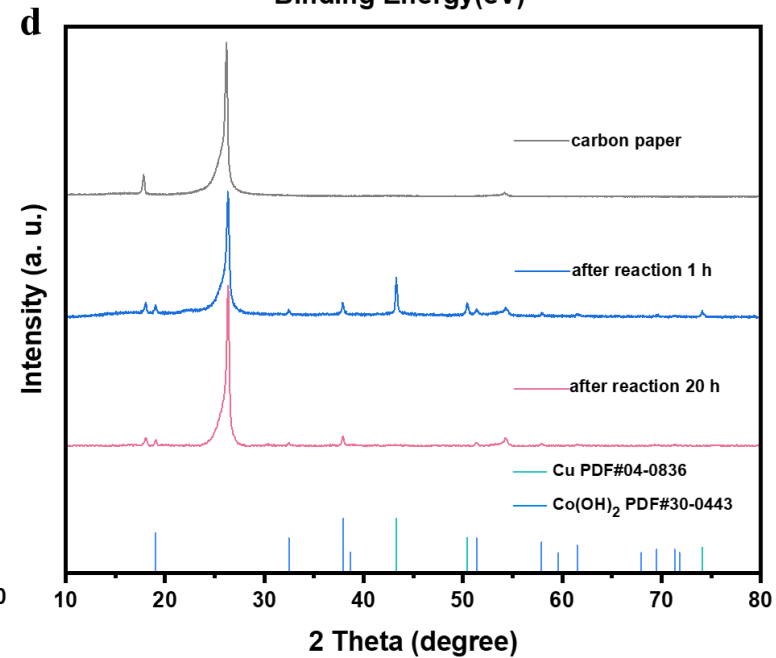

Supplement: d4gc04120h5.pdf [file d4gc04120h5.pdf]

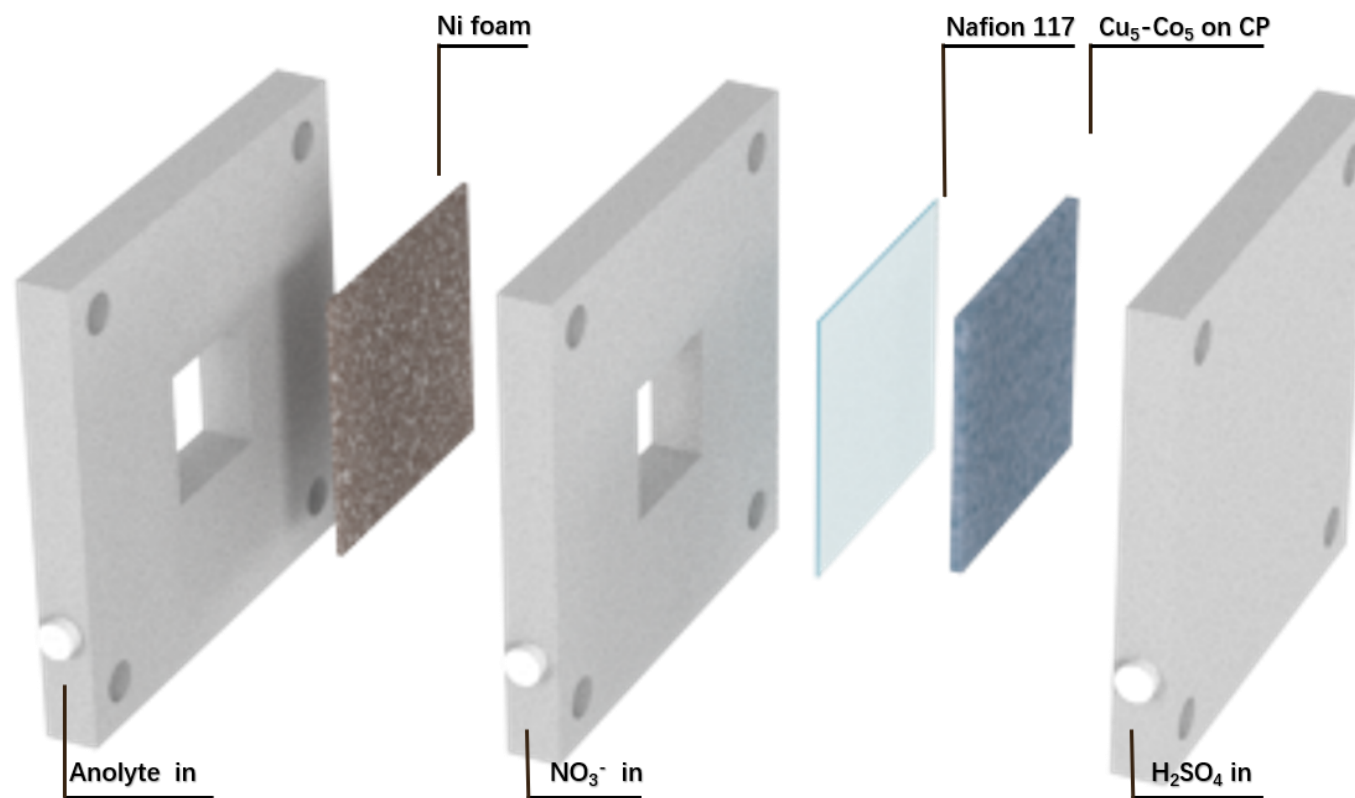

Supplement: d4gc04120h6.pdf [file d4gc04120h6.pdf]

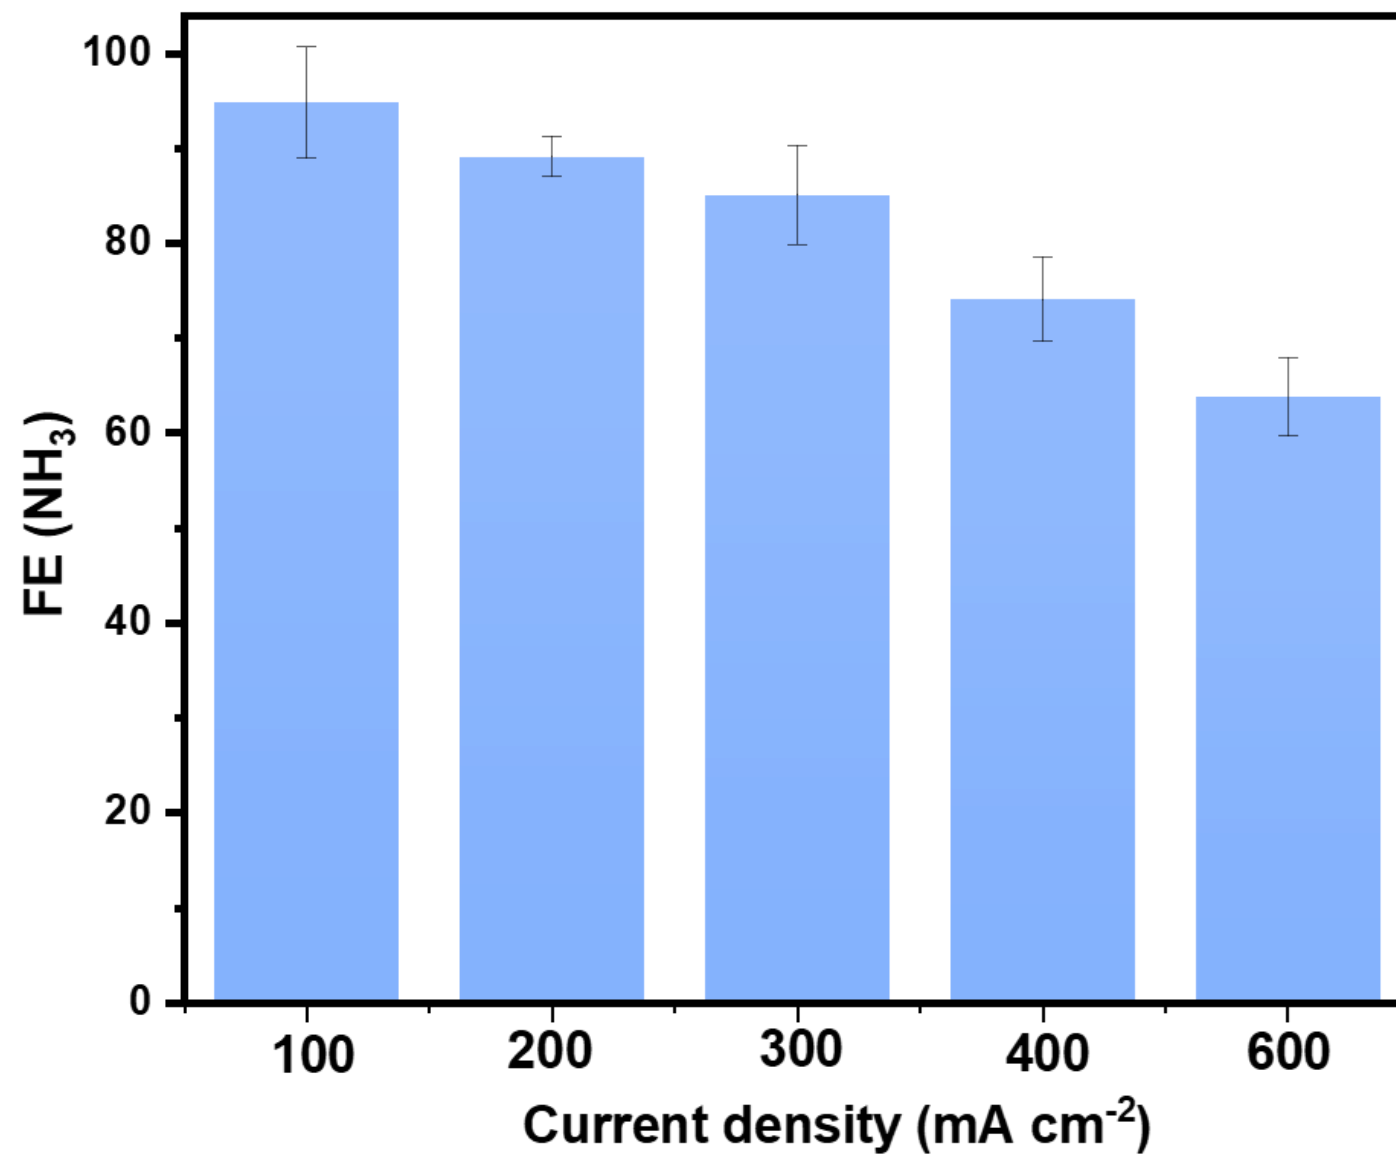

Supplement: d4gc04120h7.pdf [file d4gc04120h7.pdf]

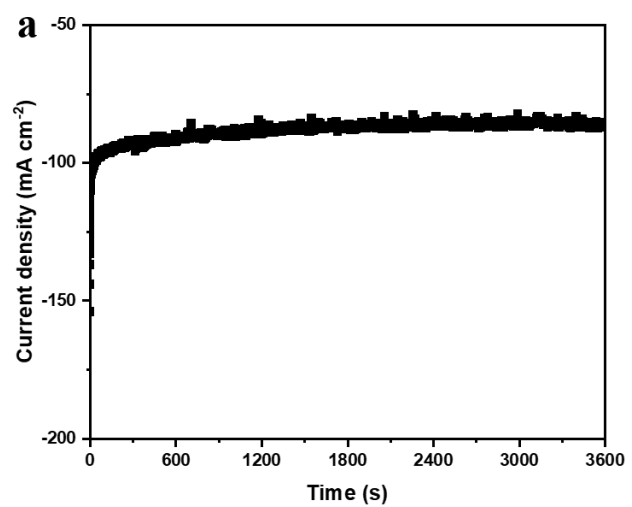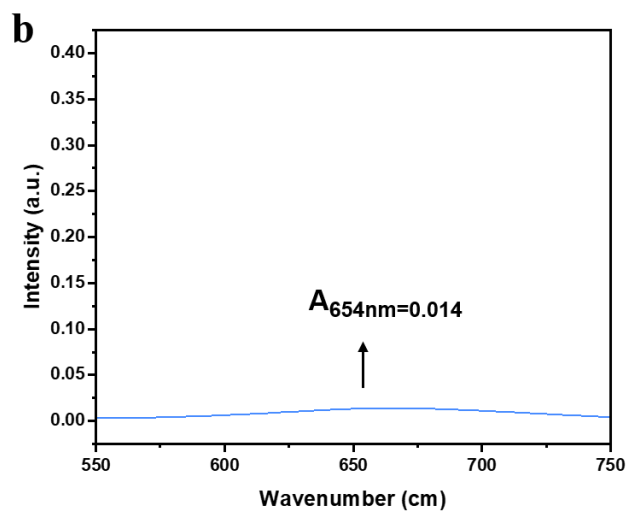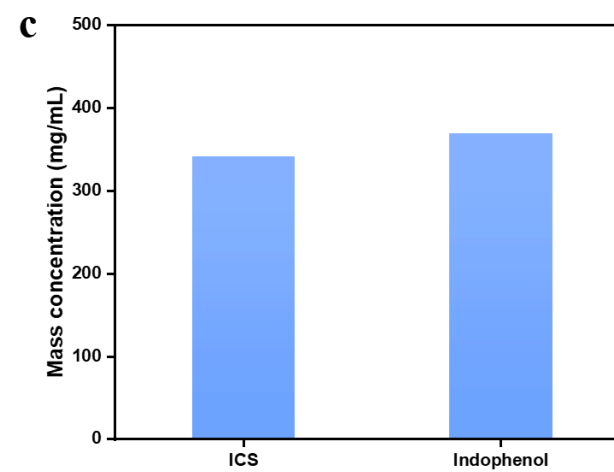

Supplement: d4gc04120h8.pdf [file d4gc04120h8.pdf]

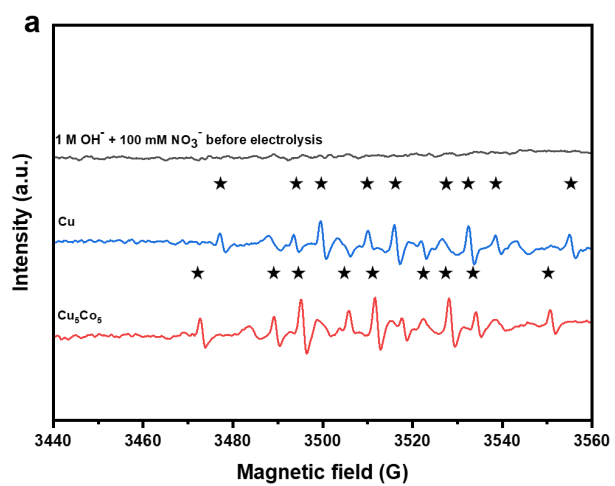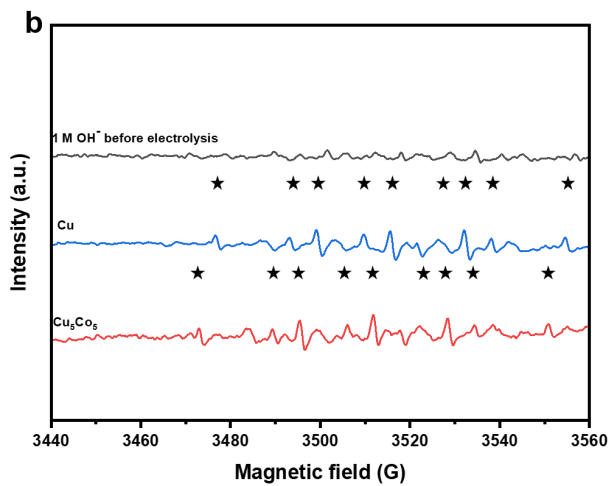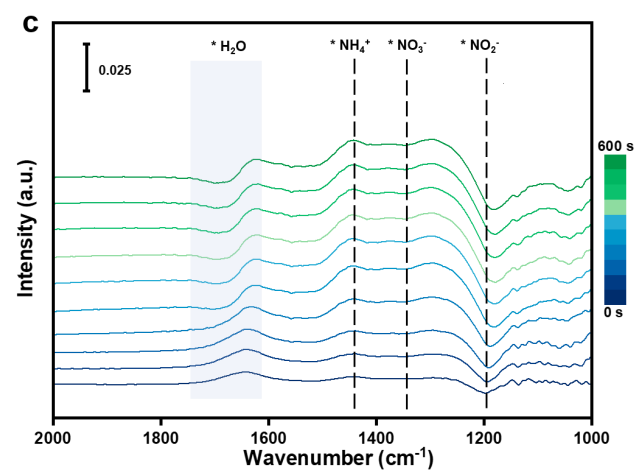

Supplement: d4gc04120h9.pdf [file d4gc04120h9.pdf]
